# Supplementary figures and images for: Ciliary Neurotrophic Factor Modulates Multiple Downstream Signaling Pathways in Prostate Cancer Inhibiting Cell Invasiveness
Source: MDPI journal article supplement (doi:10.3390/cancers14235917), 2022-11-30

Figure 3a

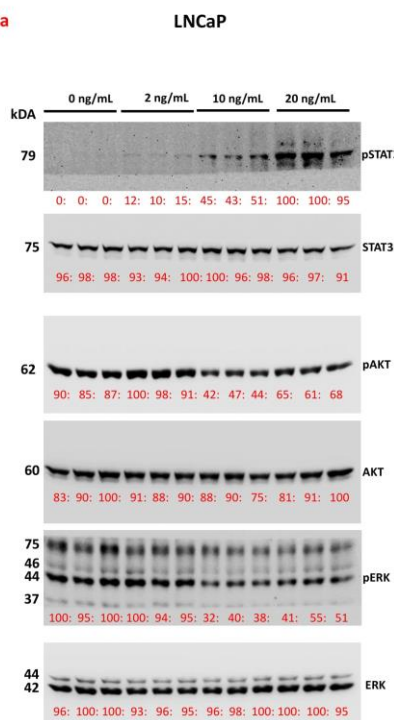

Figure 3b

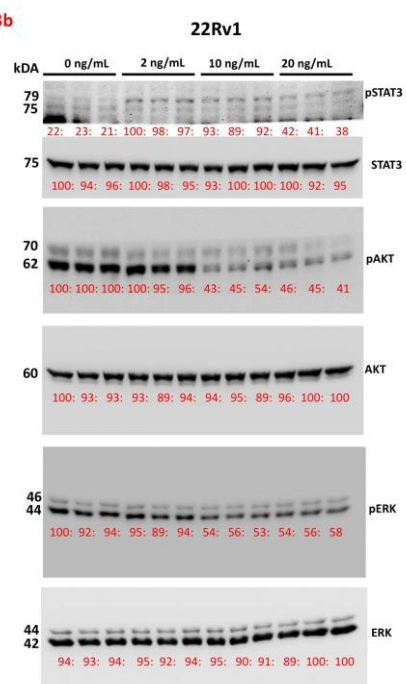

Figure 4a

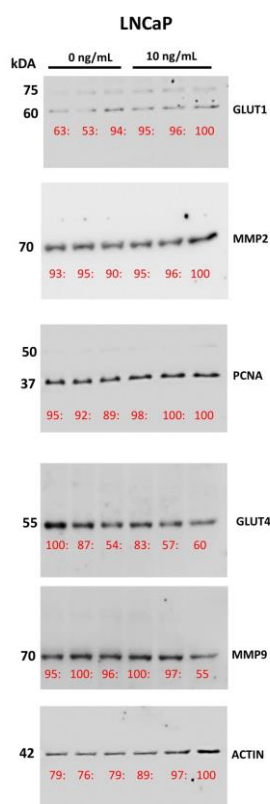

Figure 4b

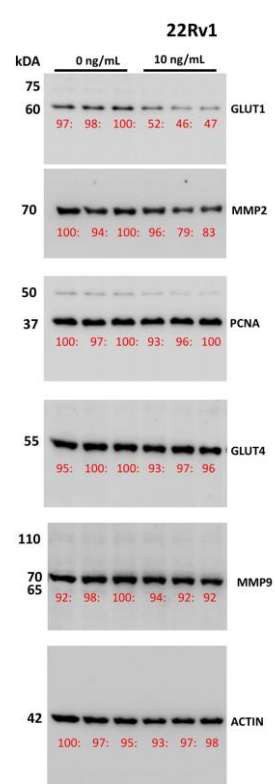

Figure S1. Original images of immunoblotting data.

Supplement: s1 [file s1]
